# Supplementary material
Source: publisher figshare collection journal article supplement (https://aacr.figshare.com/ndownloader/files/39813087)
Supplement: Supplementary file 1 [file 39813087]

**Supplementary Figure S1:** A) mRNA levels of *ANRIL*, *p14/ARF*, *p16/CDKN2A* and *p15/CDKN2B* in 22 normal human tissues. Dendrogram of these four genes, constructed using hierarchical clustering, according to their expression profiles in the 22 normal human tissues. B) mRNA levels of *ANRIL*, *p14/ARF*, *p16/CDKN2A* and *p15/CDKN2B* in 12 breast tumor tissues. Dendrogram of these four genes, constructed using hierarchical clustering, according to their expression profiles in the 12 breast tumor tissues.
